# Supplementary material for: Facile fabrication of free-standing microtubes composed of colloidal spheres
Source: Royal Society of Chemistry journal article supplement (doi:10.1039/c2nj40486a), 2012-01-01
Supplement: c2nj40486a.pdf [file c2nj40486a.pdf]

## Electronic Supporting Information

### Facile fabrication of free-standing microtubes composed of colloidal spheres

Xiaoyan Liu and Jianguo Huang\*

*Department of Chemistry, Zhejiang University, Hangzhou, Zhejiang 310027, China*

*E-mail: jghuang@zju.edu.cn*

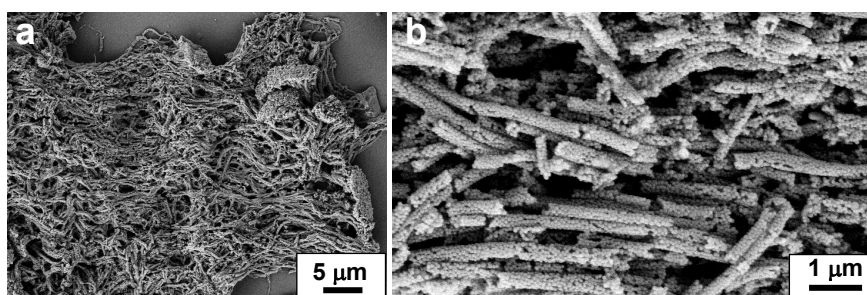

**Fig. S1** SEM images of the microtube aggregates composed of 100 nm latex microspheres obtained by dissolving off the alumina membrane template.

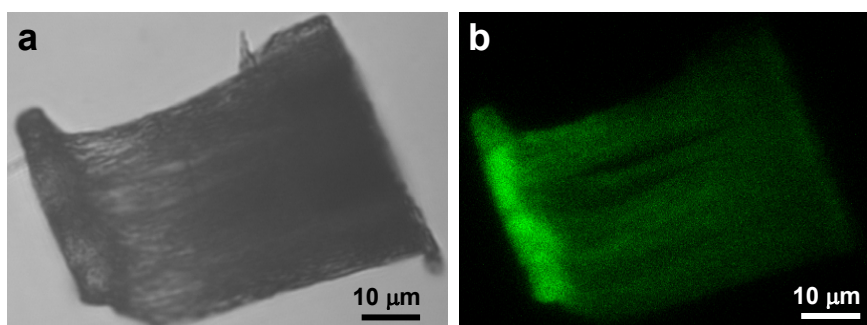

**Fig. S2** (a) Bright-field image and (b) the corresponding fluorescence microscope image of microtube aggregates composed of 50 nm latex microspheres with green fluorescence.
